# Supplementary material for: “Embodied Body Language”: an electrical neuroimaging study with emotional faces and bodies
Source: PubMed Central journal article supplement (PMC5537350; doi:10.1038/s41598-017-07262-0), 2017-07-31
Supplement: 41598_2017_7262_MOESM1_ESM.pdf [file 41598_2017_7262_MOESM1_ESM.pdf]

1 **“Embodied Body Language”**: an electrical neuroimaging study with emotional faces and  
2 **bodies.**

3

4 Marta Calbi<sup>1\*</sup>, Monica Angelini<sup>2</sup>, Vittorio Gallese<sup>1,3</sup>, Maria Alessandra Umiltà<sup>4</sup>

5

6 <sup>1</sup> Department of Medicine and Surgery, Unit of Neuroscience, University of Parma, Parma, Italy

7 <sup>2</sup> Department of Clinical and Experimental Sciences, University of Brescia, Brescia, Italy

8 <sup>3</sup> Institute of Philosophy, School of Advanced Study, University of London, UK

9 <sup>4</sup> Department of Food and Drug Sciences, University of Parma, Parma, Italy

10

11 \* Corresponding author

12 E-mail: calbimarta@gmail.com

13

14

15 **Stimuli validation**

16 Stimuli were generated by taking ecological pictures of emotional body postures and facial  
17 expressions. Eight professional actors (four males; age range: 23-34 years) were asked to display  
18 two different emotional states (happiness and sadness) and a neutral condition using their entire  
19 body and their face.

20 Photographs were taken in a classroom while the actors stood in front of a digital camera mounted  
21 on a static tripod in a black hall in light-controlled conditions. A set of standardized instructions  
22 was given to each actor indicating which was the emotion to display.

23 For each emotional category, we took pictures of different postures resulting in a total of 338  
24 pictures (172 pictures of faces and 166 pictures of entire bodies). By means of Adobe Photoshop  
25 CS6 software, faces were cropped to remove external facial features (e.g. hair) and bodies were

26 processed to remove the head. Each picture was then converted in grey-scale and presented on  
27 homogenous grey background (R:128, G:128, B:128).

28 To test the validity of the pictures (i.e., to ensure that they were easily comprehensible in terms of  
29 their intended emotions), they were presented to a group of 15 judges (seven men) with a mean age  
30 of 25.5 years (age range: 22-35 years).

31 Each picture was randomly presented for three seconds and participants were asked to rapidly  
32 categorize the emotion displayed by each image as “happiness”, “sadness”, “neutral” or “none of  
33 these”. The option “none of these” has been given *to reduce the likelihood that agreement on a  
34 particular option was an artefact of the response format*<sup>60,61</sup>. Only pictures that were evaluated  
35 consistently by at least 80% of the judges were included in the experimental set. On the basis of the  
36 results obtained by the validation, we selected 32 pictures (16 bodies and 16 faces), displaying four  
37 actors (two male). The average percentage of recognition was 98% for emotional facial expressions  
38 and 95% for emotional body postures.

39

40

## 41 **EEG Analysis**

### 42 **Global electric field analyses**

43 Two statistical analyses were conducted on the global electric field: a) assessment of modulations in  
44 electric field strength, as measured by the instantaneous Global Field Power (GFP); b) assessment  
45 of modulations in electric field topography, measuring the global spatial dissimilarity index  
46 (DISS)<sup>42</sup>.

47 Significant modulations in GFP and DISS between the compared experimental conditions were  
48 assessed by non-parametric statistical analyses based on point-wise randomization tests<sup>43</sup>.

49 Randomization provides a robust non-parametric method to test for differences in any variable  
50 without any assumption regarding data distribution, by comparing the observed data set with

51 random shuffling of the same values over sufficiently large number of iterations (i.e., permutations);  
52 this method allows one to determine the probability that the data might be observed by chance. In  
53 the present study, the point-wise randomization tests ran 1000 permutations per data point and the  
54 significance level was set at  $p < .05$ , with an additional temporal stability acceptance criterion of 20  
55 ms of consecutive significant difference<sup>41</sup>.

56 These two analyses allowed a neurophysiological interpretation of the ERP modulations: indeed,  
57 differences in GFP without simultaneous topographic changes are indicative of amplitude  
58 modulation of statistically indistinguishable generators between experimental conditions.  
59 Conversely, topographic differences between conditions, with or without concomitant GFP  
60 modulations, necessarily derive from changes in the configuration of the underlying active brain  
61 sources<sup>39</sup>.

62 Changes in electric field strength were assessed by means of the statistical comparison of the GFP  
63 between compared conditions for each participant<sup>39,42</sup>. GFP is the spatial standard deviation of the  
64 potentials at all electrodes at a given time point: it is calculated as the square root of the mean of the  
65 squared value recorded at each electrode (measured versus the average reference) and has higher  
66 values for stronger electric fields<sup>39,42</sup>. Point-wise paired randomizations were conducted on the GFP  
67 of single-subjects ERP averages between conditions at each time frame, with a significance level set  
68 at  $p < .05$  and a temporal acceptance criterion of 20 ms of consecutive significant difference.

69 Significant periods of topographic modulation were identified using randomization statistics applied  
70 to DISS<sup>39,42</sup> between conditions, calculated for each time point and each participant data. DISS is a  
71 strength-independent index of configuration differences between two electric fields and it is  
72 calculated as the square root of the mean of the squared differences between the instantaneous  
73 voltage potentials (measured versus the average reference) across the electrodes montage, each of  
74 which is first scaled to unitary strength by dividing it by the instantaneous GFP. Point-wise paired  
75 randomizations were performed on the DISS data: this analysis is also known as “topographic

76 analysis of variance” (TANOVA) (Murray et al., 2008). As above, 1000 permutations for each time  
77 point were performed and only effects with  $p < .05$  and lasting for 20 ms or longer<sup>41</sup> were  
78 considered significant.

79 While GFP modulations indicate quantitative changes, DISS modulations between sessions reflect  
80 qualitative changes in the underlying generators configuration<sup>39</sup>.

81 The results of the above topographic global scalp electric field analysis (TANOVA) defined time  
82 periods during which intracranial sources were estimated, using a distributed linear inverse solution  
83 based on a Local Auto-Regressive Average (LAURA) regularization approach<sup>44</sup>. LAURA model  
84 reconstructs the brain electric activity in each point of a 3D grid of solution points, selecting the  
85 source configuration that better mimics the biophysical behavior of electric fields without *a priori*  
86 assumption on the number of dipoles in the brain. The solution space was calculated on a locally  
87 spherical head model with anatomical constraints (L-SMAC)<sup>62</sup> and comprised 3001 solution points  
88 (voxels) homogeneously distributed within the brain structures of the Montreal Neurological  
89 Institute (MNI152) average brain. All solution points were labeled with their Talairach and  
90 Tournoux coordinates<sup>63</sup> as well as their anatomical labels.

91 Intracranial source estimations for each participant and condition over time windows defined by the  
92 TANOVA were then statistically compared by means of a “voxel-wise parametric mapping  
93 analysis”<sup>45</sup>. To do that, individual ERP data were averaged over time periods of significant  
94 topographic modulation, in order to generate a single data point per period for each participant and  
95 condition.

96 LAURA source estimations for each solution point, normalized by their RMS values (root mean  
97 square), were then contrasted by means of paired  $t$  tests. Solution points with  $p$  values  $< .05$  ( $t_{(19)} >$   
98  $2.09/ < -2.09$ ) were considered significant; in addition, a cluster threshold of at least 10 contiguous  
99 activated solution points was applied. Source analyses were performed using Cartool software<sup>40</sup>.

100

## 101 **Behavioural Analysis**

102 Reaction times (RTs) that exceeded the mean value  $\pm 2$  *SD* were discarded. Accuracy data were  
103 converted to arcsin values. Both RTs and accuracy data were subjected to separate multifactorial  
104 repeated-measures ANOVAs with eight within-subject factors (S1: face or body; S2: face or body;  
105 Condition: Congruence or Incongruence; Response hand: left or right). Tukey post hoc tests were  
106 used to further explore significant interactions.

107

## 108 **Results**

### 109 **Behavioural Results**

110 Analysis of accuracy data revealed a significant main effect of S2 ( $F_{(1,23)} = 12.066, p = .002$ )  
111 indicating that participants were more accurate when S2 was a face (80.9,  $SE = 1.28$ ) than when it  
112 was a body (78.8,  $SE = 1.13$ ). Participants were more accurate in response to Congruent (80.5,  $SE =$   
113 1.1) than to Incongruent pictures (79.2,  $SE = 1.29$ ) as indicated by a significant main effect of  
114 Condition ( $F_{(1,23)} = 6.7091, p = .016$ ). The ANOVA also revealed a significant S2 x Hand  
115 interaction ( $F_{(1,23)} = 5.3396, p = .03$ ) that was driven by more accuracy in responding to body-S2  
116 with the right hand (79.8,  $SE = 1.03$ ) than when participants responded with the left hand (77.8,  $SE$   
117 = 1.32) (post hoc tests:  $p = .03$ ). When participants responded to face-S2 there was no difference  
118 responding with right or left hand (post hoc tests:  $p = .98$ ). The significant Condition x Hand  
119 interaction ( $F_{(1,23)} = 7.5332, p = .01$ ) revealed that in the Congruent condition participants made less  
120 error when they responded with the right hand (81.8,  $SE = 1.04$ ) than when with the left hand (79.3,  
121  $SE = 1.29$ ) (post hoc tests:  $p = .0006$ ). In the Incongruent condition, instead, there was no difference  
122 due to response hand (post hoc tests:  $p = .98$ ). In sum, when participants responded with the right  
123 hand there was a significant difference in accuracy data between Congruence and Incongruence  
124 (Congruence: 81.8,  $SE = 1.04$ , Incongruence: 78.9,  $SE = 1.25$ ) (post hoc tests:  $p = .008$ ), but not

125 when they responded with the left hand (Congruence: 79.3,  $SE = 1.29$ ; Incongruence: 79.6,  $SE =$   
126 1.50).

127 Analysis of the reaction times (RTs) revealed a main effect of S2 ( $F_{(1,23)} = 25.841, p = .00004$ ) that  
128 was due to the responses to face-S2 (702 ms,  $SE = 17.8$ ) being faster than those to body-S2 (731  
129 ms,  $SE = 17.6$ ). The significant main effect of S1 ( $F_{(1,23)} = 11.591, p = .002$ ) was driven by faster  
130 responses when S1 was a face (711 ms,  $SE = 17.6$ ) than when it was a body (723 ms,  $SE = 17.5$ ).

131 Participants were faster responding to Congruent (687 ms,  $SE = 17$ ) than to Incongruent condition  
132 (746 ms,  $SE = 18.9$ ) as revealed by a significant main effect of Condition ( $F_{(1,23)} = 53.098, p =$   
133 .000). The significant S2 x Condition interaction ( $F_{(1,23)} = 18.406, p = .0002$ ) revealed faster  
134 responses S2 in the Congruent condition (Face: 666 ms,  $SE = 17.7$ ; Body: 708 ms,  $SE = 16.8$ ) than  
135 responses to S2 in the Incongruent condition (Face: 739 ms,  $SE = 19$ ; Body: 754 ms,  $SE = 19.2$ ),  
136 with a significant difference among all conditions (post hoc tests:  $p < .01$ ). The significant S1 x  
137 Condition interaction ( $F_{(1,23)} = 12.457, p = .002$ ) indicated absence of significant differences in RTs  
138 due to S1 (face or body) in the Incongruent condition (Face: 747 ms,  $SE = 19.3$ ; Body: 745,  $SE =$   
139 18.8), while in the Congruent condition RTs were faster when S1 was a face (675 ms,  $SE = 16.7$ )  
140 than when it was a body (700 ms,  $SE = 17.6$ ) (post hoc tests:  $p < .0007$ ). The significant S1 x Hand  
141 interaction ( $F_{(1,23)} = 5.4463, p = .03$ ) revealed faster responses to S1 with the left hand (Face: 716.3  
142 ms,  $SE = 20$ ; Body: 736 ms,  $SE = 19$ ), while there was any difference when participants responded  
143 with the right hand (Face: 706 ms,  $SE = 16.8$ ; Body: 709 ms,  $SE = 17$ ) (post hoc tests:  $p < .0004$ ).

144 The ANOVA also revealed a significant Condition x Hand interaction ( $F_{(1,23)} = 11.549, p = .002$ ): in  
145 the Congruent condition right-hand responses (669 ms,  $SE = 16.4$ ) were faster than left-hand  
146 responses (706 ms,  $SE = 18.7$ ) (post hoc tests  $< .0007$ ), while in the Incongruent condition there was  
147 any difference in RTs due to response-hand.

148

## 149 **Electrophysiological Results**

150 The electrophysiological results of global amplitude analysis, scalp electric field (GFP) analysis and  
151 source estimations are reported separately for each comparison (see Supplementary Figs. S1-S7).

152

### 153 **FF-I vs. FF-C**

154 The global amplitude analysis (see Supplementary Figs. S1-A; S2) revealed three periods of  
155 significant ERP modulation: 1) from 132 to 196 ms after S2 onset, in particular over central clusters  
156 of electrodes (right and midline location) from 132 to 168 ms, and over posterior clusters of  
157 electrodes, more sustained on a right location, during the whole time period (around P10,  $t = -4.22$ ,  
158  $p = .0005$ ); it is compatible with a N170 modulation, with a typical posterior right topography,  
159 indexing the stage of structural encoding during faces processing<sup>13</sup>. It was characterized by higher  
160 amplitude in response to Incongruent than to Congruent condition. 2) from 200 to 250 ms after S2  
161 onset, in particular over central clusters of electrodes, at a left and midline location, over left  
162 anterior cluster of electrodes, and over posterior clusters of electrodes, at a right and midline  
163 location (around C5,  $t = 5.34$ ,  $p = .00004$ ); it is compatible with a fronto-central N200 modulation  
164 with higher amplitude to Congruent than to Incongruent condition indexing the recognition of  
165 congruent emotions<sup>23</sup> 3) from 418 to 464 ms after S2 onset, in particular over central clusters of  
166 electrodes (at a left and midline location) from 418 to 444 ms, and over posterior clusters of  
167 electrodes, at a central and right location, during the whole time window (around FC1,  $t = -3.16$ ,  $p =$   
168  $.005$ ); it is compatible with a N400 modulation of higher amplitude to Incongruent than to  
169 Congruent condition.

170 The GFP analysis (see Supplementary Fig. S1-B) showed one period of sustained difference  
171 between conditions, from 136 to 160 ms after S2 onset.

172

### 173 **BB-I vs. BB-C**

174 The global amplitude analysis (see Supplementary Figs. S1-C; S3) revealed three periods of  
175 significant ERP modulation: 1) from 138 to 274 ms after S2 onset, in particular over posterior  
176 clusters of electrodes from 166 to 228 ms, over anterior and central clusters of electrodes (in  
177 particular at a right location) from 240 to 274 ms after S2 onset, and over anterior and central  
178 clusters of electrodes (more sustained at a midline location) from 138 to 240 ms after S2 onset  
179 (around C2,  $t = 5.01$ ,  $p = .00008$ ); it is compatible with a fronto-central N200 modulation, of higher  
180 amplitude in response to Congruent than to Incongruent condition indexing the recognition of  
181 congruent emotions<sup>23</sup> 2) from 370 to 554 ms after S2 onset, in particular over central clusters of  
182 electrode from 370 to 440 ms (at a midline and left location), from 464 to 554 ms over anterior  
183 clusters of electrodes, and over posterior cluster of electrodes during the whole time period (around  
184 CP1,  $t = -3.66$ ,  $p = .002$ ); it is compatible with a N400 component, of higher amplitude for  
185 Incongruent than for Congruent condition; 3) from 682 to 706 ms after S2 onset over anterior,  
186 central and posterior electrodes at a right location (around FT8,  $t = -3.27$ ,  $p = .004$ ). It is compatible  
187 with a posterior-central Late Positivity (LP) of higher amplitude in response to Congruent than to  
188 Incongruent condition<sup>25,68</sup>.

189 The GFP analysis (see Supplementary Fig. S1-D) showed five period of sustained difference  
190 between conditions: 1) from 128 to 216 ms; 2) from 252 to 326 ms; 3) from 406 to 556 ms; 4) from  
191 898 to 942 ms; 5) from 970 to 1000 ms after S2 onset.



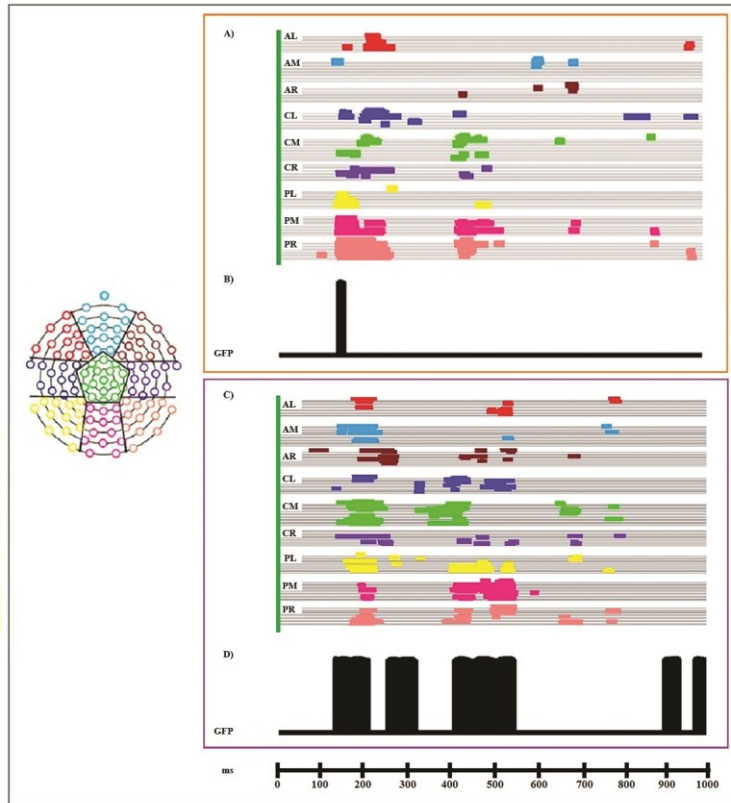

192  
193  
194  
195

Supplementary Fig.S1

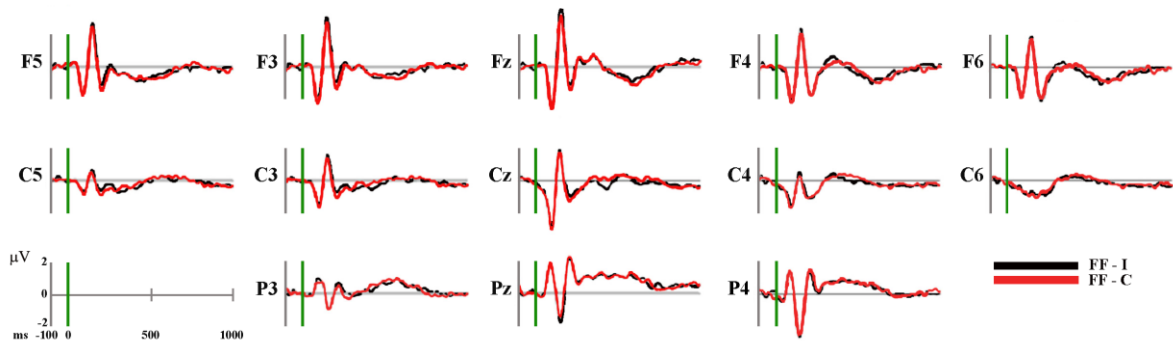

196  
197  
198

Supplementary Fig. S2

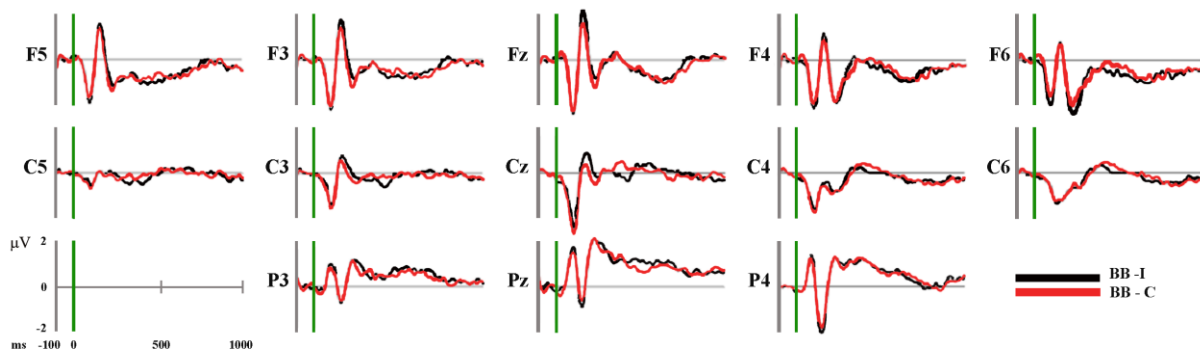

Supplementary Fig. S3

199  
200  
201  
202  
203

### Source estimations

204 For the first time period of different topography (188-244 ms after S2 onset) significant higher  
205 activity in BB-I as compared with BB-C (see Fig. 4B, orange bar; Supplementary Fig. S4-A, orange  
206 outline, in red; Supplementary table 1) was found in different brain areas including: bilateral PMc  
207 and pre-supplementary motor area (pre-SMA) (BAs 6, 8) extending in ACC (BAs 24, 32) on the  
208 right hemisphere. In the same time period, higher activity in BB-C condition (see Fig. S4-A, orange  
209 outline, in blue; Supplementary table 1) was found, among others, in left occipital cortex (BAs 17-  
210 19) and in bilateral somatosensory-related cortices (BA 5, 7).

211 In the third period of topographic modulation (676-702 ms after S2 onset) significant higher  
212 activation in BB-I was found in (see Fig. 4B, purple bar; Supplementary Fig. S4-A, purple outline,  
213 in red; Supplementary table 1) left IFG (BAs 44, 45), while higher activity in BB-C (see  
214 Supplementary Fig. S4-A, purple outline, in blue; Supplementary table 1) was found in right MTG  
215 (BAs 21, 39) and in medial frontal gyrus (BAs 10, 32).

216

217 **Supplementary Table 1. Source localization of topographic maps: comparison between BB-I**  
218 **and BB-C condition. Significant results of the statistical comparisons of LAURA source**  
219 **estimations in significant TANOVA time periods are reported with t and p values, Talairach**

220 and Tournoux coordinates (x,y,z) and anatomical labels of solution points with the local  
 221 maximum different activities.

| Condition   | TANOVA time period | <i>t</i> value | <i>p</i> value | Talairach coordinates (x,y,z) mm | Brain region label                  |
|-------------|--------------------|----------------|----------------|----------------------------------|-------------------------------------|
| BB-I > BB-C | 188-244 ms         | 3.16           | .005           | 18,-2,24                         | Right caudate                       |
|             |                    | 2.92           | .008           | 48,-17,18                        | Right insula, BA <sup>1</sup> 13    |
|             |                    | 2.83           | .01            | -63,-19,14                       | Left inferior temporal gyrus, BA 21 |
|             |                    | 2.52           | .01            | -18,0,59                         | Left middle frontal gyrus, BA6      |
| BB-C > BB-I |                    | -4.63          | .0001          | -33,-76,7                        | Left middle occipital gyrus, BA 19  |
|             |                    | -2.86          | .01            | -11,-53,34                       | Left precuneus, BA 31               |
|             |                    | -2.67          | .01            | -26,35,43                        | Left middle frontal gyrus, BA 8     |
|             |                    | -2.47          | .02            | 11,-37,54                        | Right Paracentral lobule, BA 5      |
| BB-I > BB-C | 676-702 ms         | 2.67           | .01            | -56,3,3                          | Left superior temporal gyrus, BA 22 |
| BB-C > BB-I |                    | -3.08          | .006           | 56,-54,6                         | Right middle temporal gyrus, BA 39  |
|             |                    | -2.55          | .02            | 18,48,8                          | Right medial frontal gyrus, BA 10   |

222 BA = Brodmann Area

223

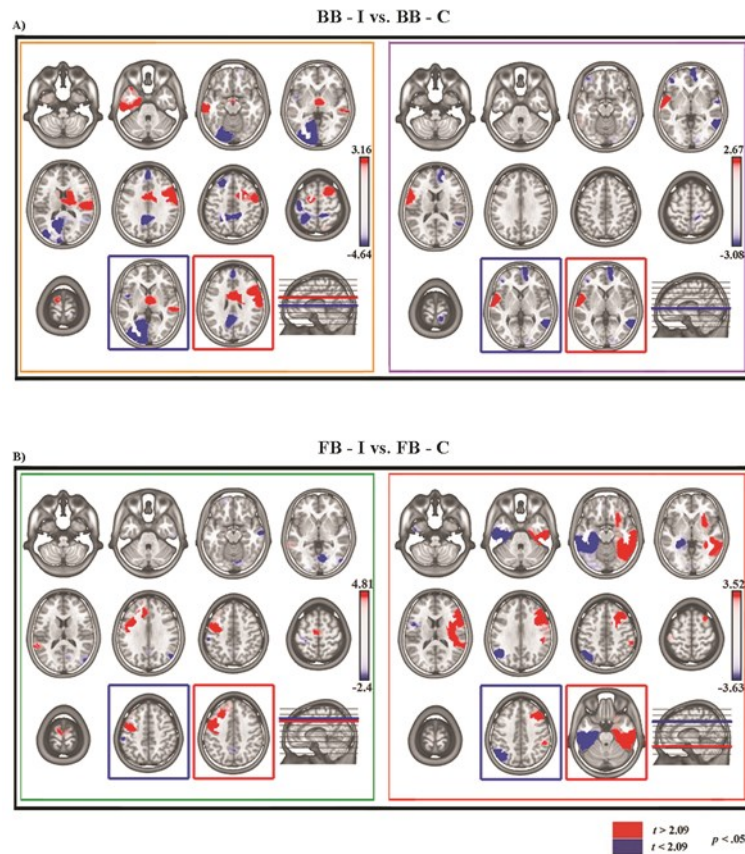

224

225

226

227 **FB-I vs. FB-C**

228 The global amplitude analysis (Supplementary Figs. S5-A; S6) revealed six periods of significant  
 229 ERP modulation:

230 1) from 194 ms to 250 ms after S2 onset, in particular over central clusters of electrodes (more  
 231 sustained at a midline location) from 194 ms to 226 ms, and over posterior clusters of electrodes  
 232 (again, more sustained at a midline location) for the whole time period (around FC1,  $t = 3.39$ ,  $p =$   
 233  $.003$ ); it is compatible with a central N200 modulation, with higher amplitude to Congruent than to  
 234 Incongruent condition indexing the recognition of congruent emotions<sup>23</sup> 2) from 372 ms to 456 ms  
 235 after S2 onset over central clusters of electrodes at a right and midline location (around C6,  $t = -$   
 236  $4.66$ ,  $p = .0002$ ), compatible with a central P300 modulation of higher amplitude to Congruent than  
 237 to Incongruent condition<sup>25,29</sup>. 3) from 496 ms to 568 ms after S2 onset over anterior, central and

238 posterior clusters of electrodes, in particular at a left location from 496 ms to 538 ms, and at a  
 239 central and right location from 500 ms to 568 ms. 4) from 580 ms to 608 ms after S2 onset over  
 240 posterior left cluster of electrodes, and over anterior and central clusters of electrodes (at a midline  
 241 and right location). These two windows (3 and 4) are compatible with an extended N400  
 242 modulation, of higher amplitude to Incongruent than to Congruent condition (around P5,  $t = -6.44$ ,  $p$   
 243  $= .00001$ ) from 626 ms to 716 ms after S2 onset, starting over posterior cluster of electrodes and  
 244 then extending over the whole scalp and 6) from 726 ms to 786 ms after S2 onset, in particular over  
 245 anterior and central cluster of electrodes (at a midline and left location) from 738 ms to 786 ms, and  
 246 over central and posterior clusters of electrodes (more sustained at a right location) for the whole  
 247 time period (around P2/O2,  $t = -4.94$ ,  $p = .0001$ ). They are considered as a LP modulation with  
 248 higher amplitude to Congruent than Incongruent condition<sup>25,68</sup>.  
 249 The analysis of the GFP (Supplementary Fig. S5-B) showed two period of sustained difference  
 250 between conditions: 1) from 514 to 540 ms; 2) from 652 to 688 ms after S2 onset.

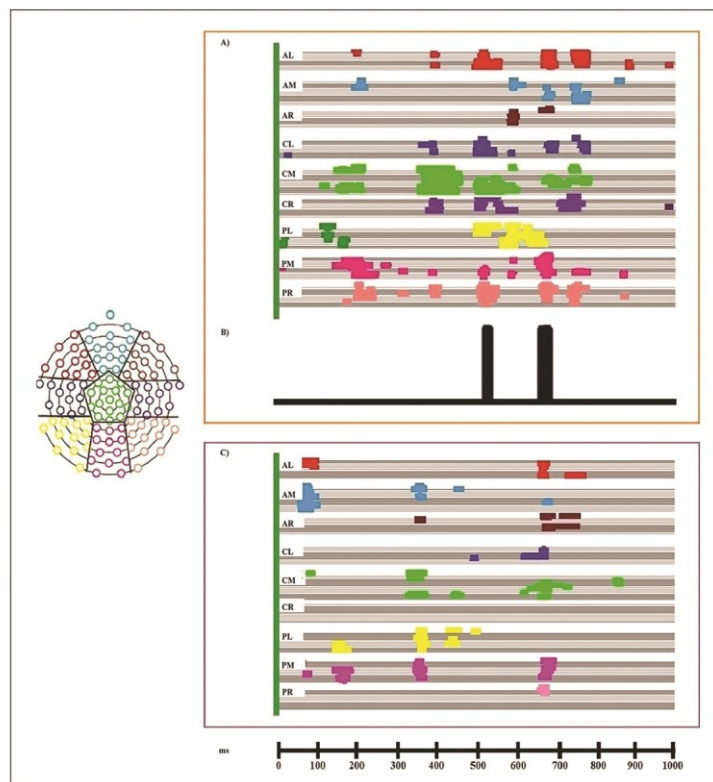

251  
 252  
 253

Supplementary Fig. S5

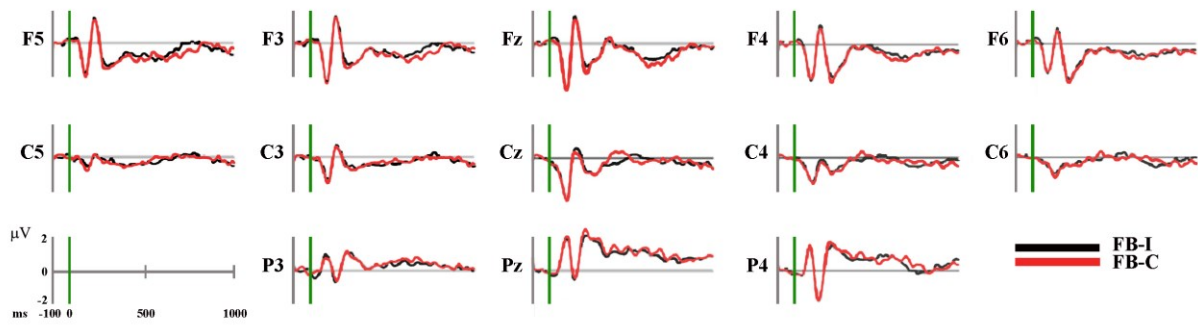

Supplementary Fig. S6

254  
255  
256  
257

### Source estimations

258 For the first time period of different topography (386-454 ms after S2 onset) significant higher  
259 activity in FB-I as compared with FB-C (Fig. 5B, green bar; Supplementary Fig. S4-B, green  
260 outline, in red; Supplementary table 2) was found in left PMc extending toward IFG (BAs 6, 9) and  
261 left prefrontal cortex encompassing-ACC (BAs 8, 9 32). Higher activity in FB-C (Supplementary  
262 Fig. S4-B, green outline, in blue; Supplementary table 2) was found in right occipital cortex (BAs  
263 18, 30).

264 In the third significant TANOVA period (736-762 ms) higher activity in FB-I (Fig. 5B, red bar;  
265 Supplementary Fig. S4-B, red outline, in red; Supplementary table 2) was found in a number of  
266 areas, including right occipitotemporal and parahippocampal regions (BAs 19-22, 35, 37, 41), IPL  
267 (BA 40), precentral and postcentral gyrus (BAs 2, 6) and IFG (BAs 9, 44, 45). Higher activity in  
268 FB-C (Fig. S4-B, red outline, in blue; table 3) was found in left occipitotemporal and  
269 parahippocampal regions (BAs 20, 28, 35-37) and in left IPL (BAs 39, 40).

270 **Supplementary Table 2. Source localization of topographic maps: comparison between FB-I**  
271 **and FB-C condition. Significant results of the statistical comparisons of LAURA source**  
272 **estimations in significant TANOVA time periods are reported with t and p values, Talairach**  
273 **and Tournoux coordinates (x,y,z) and anatomical labels of solution points with the local**  
274 **maximum different activities.**

| Condition   | TANOVA time period | t value | p value | Talairach coordinates (x,y,z) mm | Brain region label                       |
|-------------|--------------------|---------|---------|----------------------------------|------------------------------------------|
| FB-I > FB-C | 386-454 ms         | 4.81    | .0001   | -41,-9,38                        | Left precentral gyrus, BA <sup>1</sup> 6 |
|             |                    | 3.42    | .0001   | -18,27,29                        | Left medial frontal gyrus, BA 9          |
| FB-C > FB-I |                    | -2.39   | .03     | 11,-70,-6                        | Right lingual gyrus, BA 18               |
| FB-I > FB-C | 736-762 ms         | 3.52    | .002    | 56,-19,-21                       | Right fusiform gyrus, BA 20              |
|             |                    | 3.20    | .004    | 56,26,16                         | Right inferior frontal gyrus, BA 45      |
| FB-C > FB-I |                    | -3.63   | .001    | -56,-60,41                       | Left inferior parietal lobule, BA 40     |
| FB-C > FB-I |                    | -3.52   | .02     | 48,-34,-20                       | Left fusiform gyrus, BA 20               |

275 BA = Brodmann Area

276

277

278

### 279 **BF-I vs. BF-C**

280 The global amplitude analysis (Supplementary Figs. S5-C; S7) revealed three period of significant  
281 ERP modulation: 1) from 54 to 102 ms after S2 onset over anterior clusters of electrodes (at a left  
282 and midline location) (around Fz,  $t = -3.61$ ,  $p = .002$ ), compatible with an anterior N100 of higher  
283 amplitude to Incongruent than to Congruent condition 2) from 332 to 374 ms after S2 onset, in  
284 particular over posterior clusters of electrodes (at a left and midline location) from 332 to 344 ms  
285 after S2 onset, and over central cluster of electrodes for the whole time period (around Oz,  $t = -2.89$ ,  
286  $p = .01$ ), identified as a P300 modulation of higher amplitude to Congruent than to Incongruent  
287 condition<sup>25,29</sup> 3) from 656 to 692 ms after S2 onset, in particular over left and right anterior clusters  
288 of electrodes from 656 to 676 ms after S2 onset, and over central and posterior cluster of electrodes

289 (mainly at a midline location) for the whole time period (around PO4,  $t = -4.01$ ,  $p = .0007$ ),  
290 compatible with a central-posterior LP modulation of higher amplitude to Congruent than to  
291 Incongruent condition<sup>25,68</sup>.

292 The GFP analysis did not show periods of sustained difference between conditions.

293

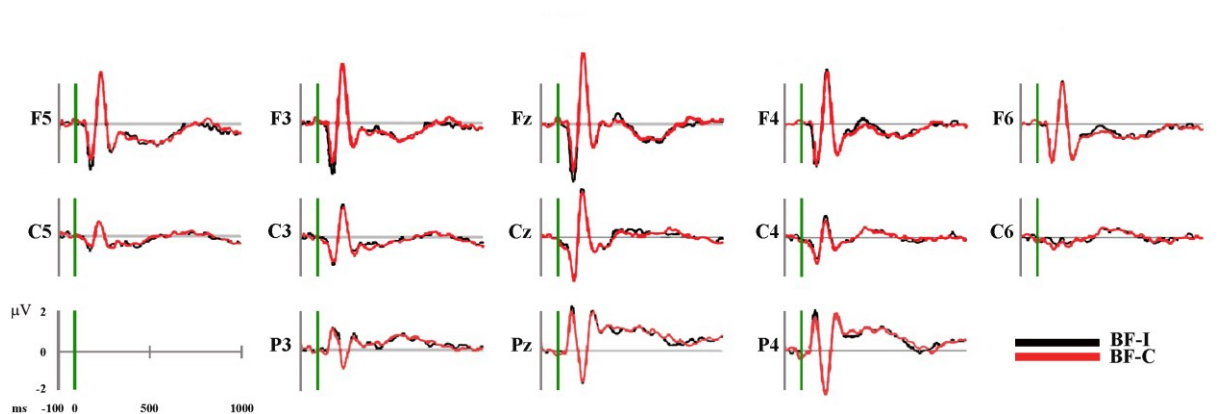

294

295

Supplementary Fig. S7

296

## 297 Discussion

### 298 BB-I vs BB-C

299 The global amplitude analysis showed a first period of significant ERP modulation between BB-I  
300 and BB-C around 140-270 ms after the S2 onset, compatible with a frontocentral N200 component  
301 of higher amplitude in response to BB-C than BB-I condition (between 190-240 ms). Of note, a  
302 previous study reported a similar N200 modulation in response to semantically congruent actions<sup>23</sup>,  
303 likely indexing their recognition. Our results further extend these previous findings, showing that  
304 this N200 modulation could also index the recognition of congruent emotions. During this period of  
305 amplitude modulation, the TANOVA suggested the involvement of different neural generators in  
306 the two conditions.



307 The source analysis showed in BB-C condition, higher activation, among others, in regions of the  
308 left ventral stream related to body processing<sup>4,5</sup> and in bilateral precuneus and PCC, involved in  
309 processing of emotion-specific information from different stimulus type<sup>64</sup>. Among activated areas,  
310 it is interesting to note the involvement of right parietal regions (Supplementary Fig. S4-A, orange  
311 outline). Since the parietal cortex is also part of the MM, it could be involved in the processing of  
312 somatosensory information conveyed by images of body postures expressing emotions, contributing  
313 to the comprehension of the observed emotional postures.

314 Among cerebral regions activated in BB-I condition, it is noteworthy the involvement of the right  
315 ACC, and of both bilateral pre-SMA and PMc (Supplementary Fig. S4-A, orange outline). The  
316 activation of ACC during the affective incongruence between S1 and S2, is in accord with its role in  
317 conflict monitoring and/or resolution<sup>65</sup>, also in emotional tasks with a cognitively demanding  
318 component<sup>66,67</sup>.

319 Regarding bilateral PMc and pre-SMA, our results are consistent with previous evidence that during  
320 the observation of emotional body postures there is an activation of these brain areas<sup>8</sup>.

321 Hence, these results suggest that the activation in both conditions of different regions pertaining to  
322 the MM (somatosensory-related cortices in the Congruent vs. bilateral premotor regions in the  
323 Incongruent condition) could contribute to the comprehension of the emotion conveyed by bodies.

324 The last significant amplitude modulation between conditions, emerged between 676-702 ms, in a  
325 time window corresponding to the typical latency range of the LP, with higher amplitude in  
326 response to BB-C than BB-I. Considering the explicit nature of our task, it likely reflected  
327 categorization and evaluation processes of the emotional content of congruent postures<sup>25,68</sup>. The  
328 TANOVA confirmed the overlapping of significant topographic difference between conditions, and  
329 the source analysis revealed the activation of the left IFG in BB-I and of mPFC in BB-C condition  
330 (Supplementary Fig. S4-A, purple outline).

331

## 332 **FB-I vs FB-C**

333 The global amplitude analysis showed a period of significant ERP modulation between about 370-  
334 450 ms after S2 onset, in a time window corresponding to the latency range of the P300 component,  
335 with higher amplitude in response to FB-C than FB-I condition, probably indexing the recognition  
336 process underpinned by cortical body- and face areas<sup>25</sup>. The TANOVA confirmed the overlapping  
337 of significant topographic difference between conditions, and the source analysis established the  
338 activation of right occipital regions in FB-C (Supplementary Fig. S4-B, green outline). The  
339 activation of left ACC in FB-I condition suggest its higher cognitively demanding component<sup>65-67</sup>.  
340 Interestingly, activation of left PMc and IFG emerged during FB-I condition (Supplementary Fig.  
341 S4-B, green outline), likely indexing the involvement of MM for action representation and  
342 comprehension.

343 The last significant amplitude modulation between conditions, emerged between 736-762 ms, in a  
344 time window corresponding to the latency range of the LP, with higher amplitude in response to  
345 FB-C than FB-I, likely reflecting categorization and evaluation processes of the emotional content  
346 of congruent postures<sup>25,68</sup>, as for BB-C condition. The TANOVA confirmed the overlapping of  
347 significant topographic difference between conditions, and the source analysis revealed a common  
348 activation of temporal and parahippocampal regions. The significant activation in FB-I condition of  
349 right IFG, PMc and ACC could index the higher effort required to solve its double level conflict and  
350 to make a correct evaluation.

351

## 352 **References**

353 60. Frank, M.G. & Stennett, J. The forced-choice paradigm and the perception of facial expressions  
354 of emotion. *J. Pers. Soc. Psychol.* **80**, 75-85 (2001).

355

356 61. Tracy, J.L., Robins, R.W. & Schriber, R. A. Development of a FACS-verified set of basic and  
357 self-conscious emotion expressions. *Emotion.* **9**, 554-9 (2009).

358

- 359 62. Spinelli, L., Andino, S.G., Lantz, G., Seeck, M. & Michel, C.M. Electromagnetic inverse  
360 solutions in anatomically constrained spherical head models. *Brain Topogr.* **13**, 115-25 (2000).  
361
- 362 63. Talairach, J. & Tournoux, P. Co-planar stereotaxic atlas of the human brain. New York (NY)  
363 (Thieme Medical Publisher, 1988).  
364
- 365 64. Kim, J. et al. Abstract representations of associated emotions in the human brain. *J. Neurosci.*  
366 **35**, 5655-63 (2015).  
367
- 368 65. Botvinick, M.M., Cohen, J.D. & Carter, C.S. Conflict monitoring and anterior cingulate cortex:  
369 an update. *Trends Cogn. Sci.* **8**, 539-46 (2004).  
370
- 371 66. Kerns, J.G. et al. Anterior cingulate conflict monitoring and adjustments in control. *Science.*  
372 **303(5660)**, 1023-6 (2004).  
373
- 374 67. Müller, V.I. et al. Incongruence effects in crossmodal emotional integration. *Neuroimage.* **54**,  
375 2257-66 (2011).  
376
- 377 68. Wu, Y.C., Coulson, S. Meaningful gestures: electrophysiological indices of iconic gesture  
378 comprehension. *Psychophysiology*, **42**, 654–67 (2005).  
379  
380

381

## 382 **Figure Legends**

383 **Fig. S1 Electrophysiological results of “intra-category” session: global ERP amplitude**  
384 **analysis and global electric field strength analysis.**

385 (A) Statistical analysis of global ERP amplitude. Periods of significant differences of ERP  
386 amplitude ( $p < .05$ ; duration  $\geq 20$  ms) at each electrode and time point between FF-I and FF-C  
387 conditions are displayed as colored horizontal lines. Each horizontal line represents one scalp  
388 electrode. Different colors indicate different clusters of electrodes; the distribution of the clusters  
389 over the electrode montage is shown in the inset on the left side of the figure. AL: anterior left; AM:  
390 anterior midline; AR: anterior right. CL: central left; CM: central midline; CR: central right. PL:  
391 posterior left; PM: posterior midline; PR: posterior right. (B) Global scalp electric field analyses:  
392 statistical analysis of global electric field strength. Black areas indicate time intervals of significant

393 differences ( $p < .05$ ; duration  $\geq 20$  ms) of Global Field Power (GFP) between FF-I and FF-C  
394 conditions. (C) Statistical analysis of global ERP amplitude. Periods of significant differences of  
395 ERP amplitude ( $p < .05$ ; duration  $\geq 20$  ms) at each electrode and time point between BB-I and BB-  
396 C conditions are displayed as colored horizontal lines. Each horizontal line represents one scalp  
397 electrode. Different colors indicate different clusters of electrodes; the distribution of the clusters  
398 over the electrode montage is shown in the inset on the left side of the figure. AL: anterior left; AM:  
399 anterior midline; AR: anterior right. CL: central left; CM: central midline; CR: central right. PL:  
400 posterior left; PM: posterior midline; PR: posterior right. (D) Global scalp electric field analyses:  
401 statistical analysis of global electric field strength. Black areas indicate time intervals of significant  
402 differences ( $p < .05$ ; duration  $\geq 20$  ms) of Global Field Power (GFP) between BB-I and BB-C  
403 conditions.

404

405 **Fig. S2 ERP waveforms for S2 in the two experimental conditions: FF-I and FF-C at selected**  
406 **electrodes.**

407 Group-averaged ( $n = 20$ ) S2-locked ERP waveforms, plotted as voltage in  $\mu\text{V}$  as function of time in  
408 ms (stimulus onset: 0 ms). Black: FF-I; red: FF-C.

409

410 **Fig. S3 ERP waveforms for S2 in the two experimental conditions: BB-I and BB-C at**  
411 **selected electrodes.**

412 Group-averaged ( $n = 20$ ) S2-locked ERP waveforms, plotted as voltage in  $\mu\text{V}$  as function of time in  
413 ms (stimulus onset: 0 ms). Black: BB-I; red: BB-C.

414

415 **Fig. S4 Statistical comparison of LAURA source estimations between BB-I and BB-C and**  
416 **between FB-I and FB-C over significant TANOVA time intervals.**

417 (A) All significant voxels are colored ( $t(19) > 2.09 / < -2.09$ ,  $p < .05$ ): positive  $t$  values (red color)  
418 indicate higher current source densities in BB-I than in BB-C; negative  $t$  values (blue color) indicate  
419 higher current source densities in BB-C than in BB-I. LAURA solutions are rendered on MNI152  
420 template brain (left hemisphere on the left side). Orange outline: first significant TANOVA time  
421 interval (188-244 ms after S2 onset). Purple outline: third significant TANOVA time interval (676-  
422 702 ms after S2 onset). (B) All significant voxels are colored ( $t(19) > 2.09 / < -2.09$ ,  $p < .05$ ):  
423 positive  $t$  values (red color) indicate higher current source densities in FB-I than in FB-C; negative  $t$   
424 values (blue color) indicate higher current source densities in FB-C than in FB-I. LAURA solutions  
425 are rendered on MNI152 template brain (left hemisphere on the left side). Green outline: first  
426 significant TANOVA time interval (386-454 ms after S2 onset). Purple outline: third significant  
427 TANOVA time interval (736-762 ms after S2 onset).

428

429 **Fig. S5 Electrophysiological results of “cross-category” session: Global ERP amplitude**  
430 **analysis and global electric field strength analysis.**

431 (A) Statistical analysis of global ERP amplitude. Periods of significant differences of ERP  
432 amplitude ( $p < .05$ ; duration  $\geq 20$  ms) at each electrode and time point between FB-I and FB-C  
433 conditions are displayed as colored horizontal lines. Each horizontal line represents one scalp  
434 electrode. Different colors indicate different clusters of electrodes; the distribution of the clusters  
435 over the electrode montage is shown in the inset on the left side of the figure. AL: anterior left; AM:  
436 anterior midline; AR: anterior right. CL: central left; CM: central midline; CR: central right. PL:  
437 posterior left; PM: posterior midline; PR: posterior right. (B) Global scalp electric field analyses:  
438 statistical analysis of global electric field strength. Black areas indicate time intervals of significant

439 differences ( $p < .05$ ; duration  $\geq 20$  ms) of Global Field Power (GFP) between FB-I and FB-C  
440 conditions. (C) Statistical analysis of global ERP amplitude. Periods of significant differences of  
441 ERP amplitude ( $p < .05$ ; duration  $\geq 20$  ms) at each electrode and time point between BF-I and BF-C  
442 conditions are displayed as colored horizontal lines. Each horizontal line represents one scalp  
443 electrode. Different colors indicate different clusters of electrodes; the distribution of the clusters  
444 over the electrode montage is shown in the inset on the left side of the figure. AL: anterior left; AM:  
445 anterior midline; AR: anterior right. CL: central left; CM: central midline; CR: central right. PL:  
446 posterior left; PM: posterior midline; PR: posterior right.

447

448

449 **Fig. S6 ERP waveforms for S2 in the two experimental conditions: FB-I and FB-C at selected**  
450 **electrodes.**

451 Group-averaged ( $n = 20$ ) S2-locked ERP waveforms, plotted as voltage in  $\mu\text{V}$  as function of time in  
452 ms (stimulus onset: 0 ms). Black: FB-I; red: FB-C.

453

454 **Fig. S7 ERP waveforms for S2 in the two experimental conditions: BF-I and BF-C at selected**  
455 **electrodes.**

456 Group-averaged ( $n = 20$ ) S2-locked ERP waveforms, plotted as voltage in  $\mu\text{V}$  as function of time in  
457 ms (stimulus onset: 0 ms). Black: BF-I; red: BF-C.

458
